# Supplementary material
Source: Springer Nature journal article supplement (https://www.springerprofessional.de/resource/supplementary/13638_2010_198_MOESM4_ESM.pdf/11897252)

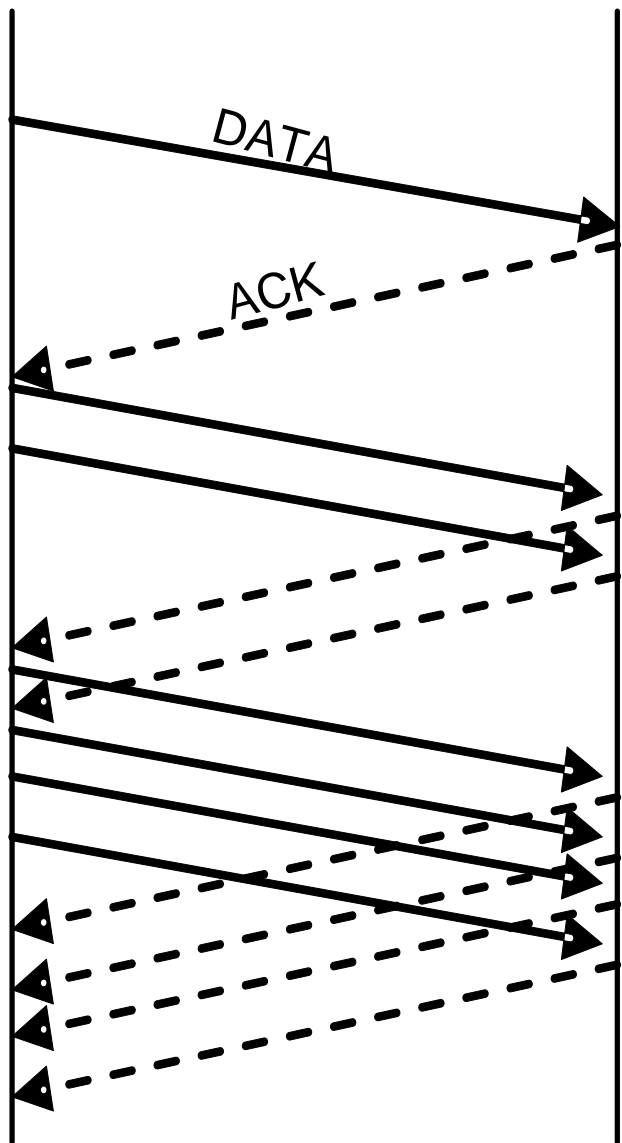

(a)

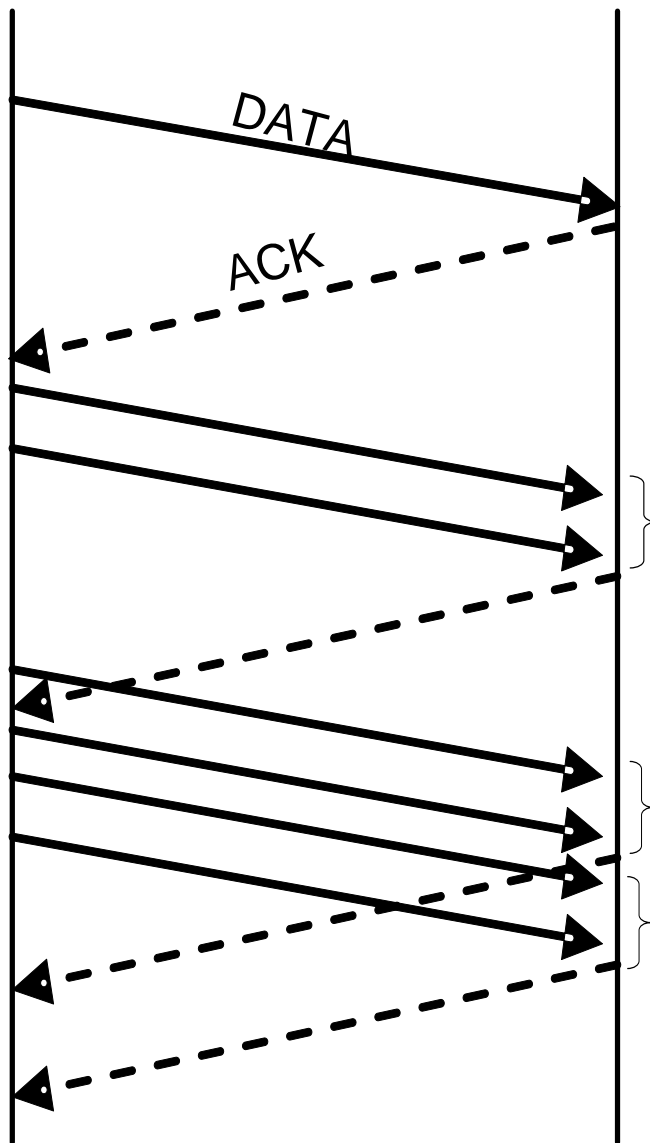

(b)

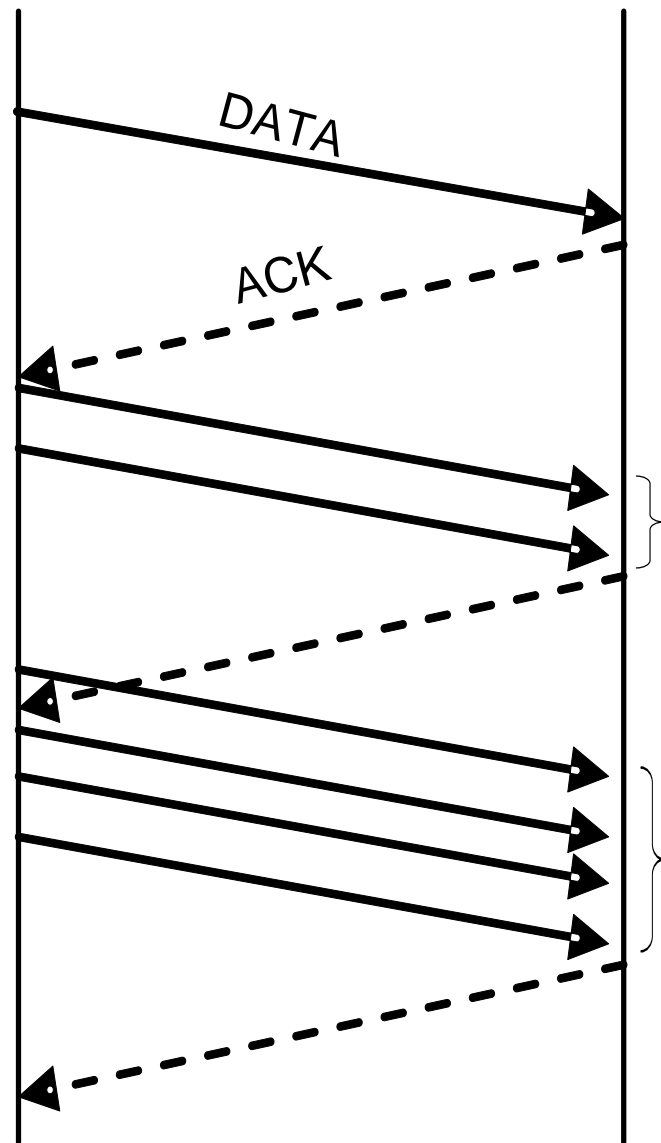

(c)

Supplement: MOESM4 [file 11897252]
